# Supplementary material for: High performance two-ply carbon nanocomposite yarn supercapacitors enhanced with a platinum filament and in situ polymerized polyaniline nanowires
Source: Royal Society of Chemistry journal article supplement (doi:10.1039/c5ta10667b), 2016-01-01
Supplement: c5ta10667b1.pdf [file c5ta10667b1.pdf]

Supporting Information

**High performance two-ply carbon nanocomposite yarn supercapacitors enhanced with platinum filament and in-situ polymerized polyaniline nanowires**

*Qiufan Wang<sup>a</sup>, Yunlong Wu<sup>a</sup>, Ting Li<sup>a</sup>, Daohong Zhang<sup>a\*</sup>, Menghe Miao<sup>a\*</sup>, Aiqing Zhang<sup>a</sup>*

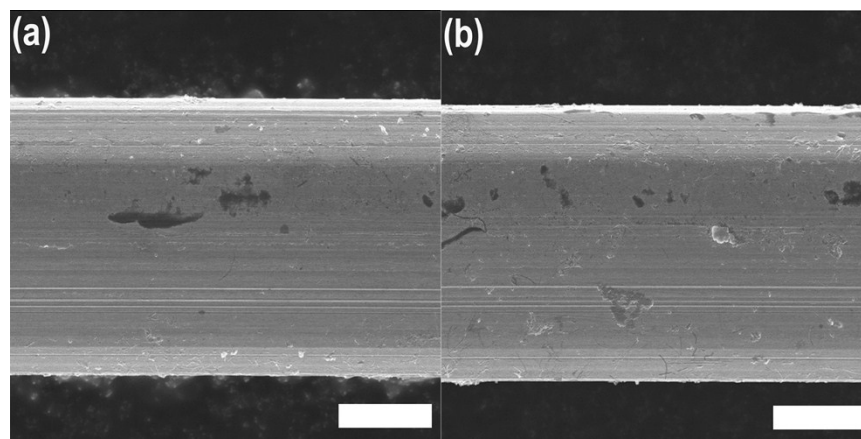

**Figure S1.** SEM images of the Pt filament before (a) and after (b) in-situ polymerization of polyaniline nanowires. Scale bars: 1  $\mu\text{m}$ .

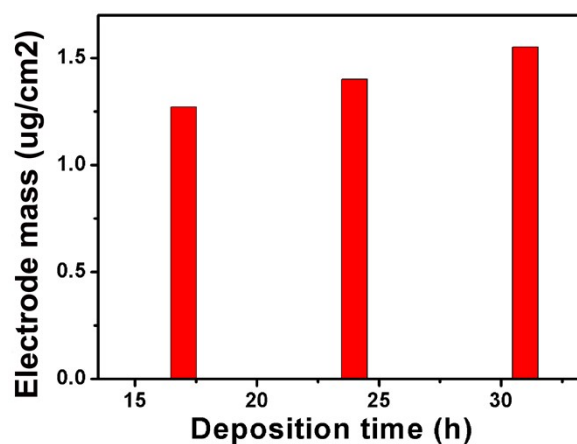

**Figure S2.** Effect of deposition time on electrode mass.

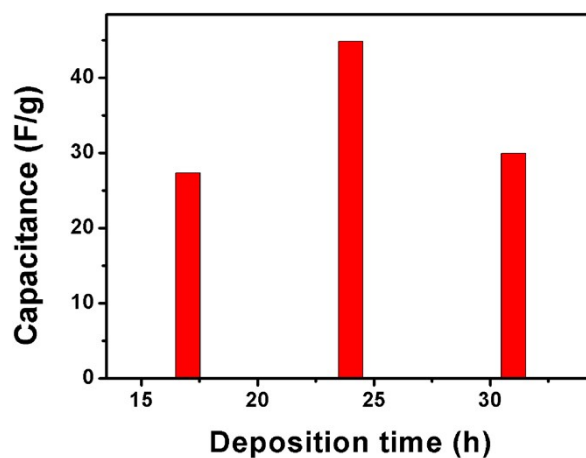

**Figure S3.** Effect of the deposition time on the gravimetric capacitance of the two-ply SCs based on the Pt/CNT@PANI yarn (The CV curves measured at 500 mV/s).

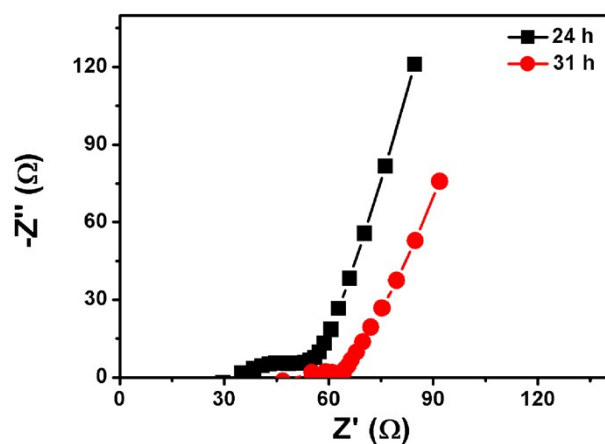

**Figure S4.** EIS curves of Pt/CNT@PANI yarn SCs polymerized for 24 h and 31 h.

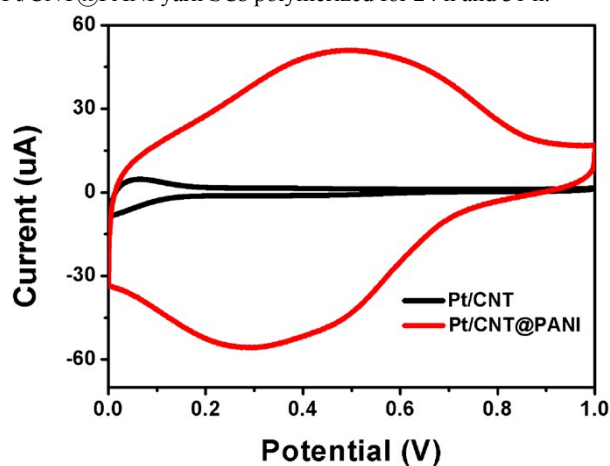

**Figure S5.** CV curves at scan rate of 100 mV/s for the pure Pt/CNT and Pt/CNT@PANI yarn SCs.

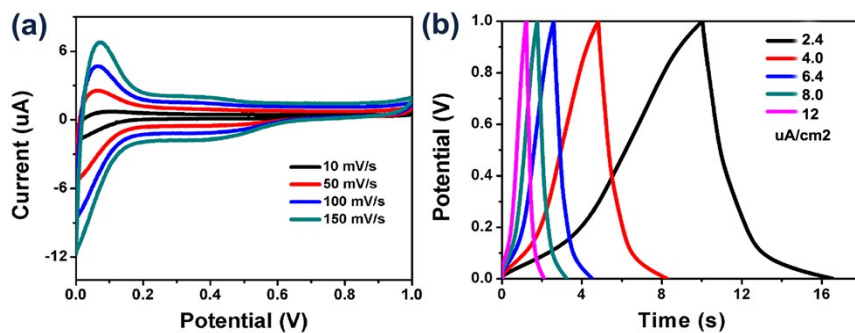

**Figure S6.** Electrochemical characteristics of pure Pt/CNT yarn SC, (a) CV curves at different scan rates, (b) galvanostatic charge/discharge curves at different current densities.

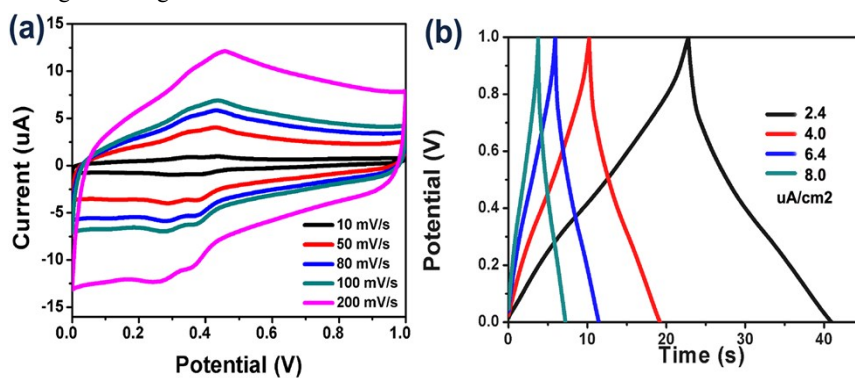

**Figure S7.** Electrochemical characteristics of CNT@PANI yarn SC, (a) CV curves at different scan rates, (b) galvanostatic charge/discharge curves at different current densities.

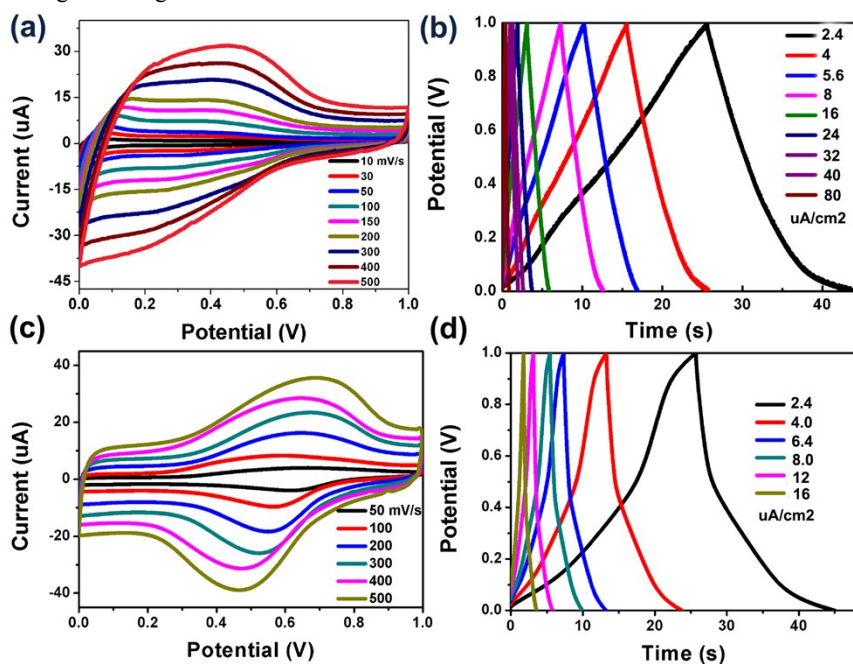

**Figure S8.** Effect of deposition duration on electrochemical characteristics of Pt/CNT@PANI yarn SCs. (a) CV curves at different scan rates, deposition duration 17 h; (b) galvanostatic charge/discharge curves at different current densities, deposition duration 17 h; (c) CV curves at different scan rates, deposition duration 31 h; (b&d) galvanostatic charge/discharge curves at different current densities, deposition duration 31 h.
